# Supplementary material for: Systemic Anti-Cancer Therapy in Synovial Sarcoma: A Systematic Review
Source: PubMed Central journal article supplement (PMC6267101; doi:10.3390/cancers10110417), 2018-11-01
Supplement: cancers-10-00417-s001.pdf [file cancers-10-00417-s001.pdf]

# Systemic Anti-Cancer Therapy in Synovial Sarcoma: A Systematic Review

Richard F. Riedel, Robin L. Jones, Antoine Italiano, Chet Bohac, Juliette C. Thompson, Kerstin Mueller, Zaeem Khan, Seth M. Pollack and Brian A. Van Tine

**Table S1.** Search Strategies implemented in each database. Note that the search was originally designed to also include myxoid and round cell liposarcoma.

| Database searched: Ovid MEDLINE(R) Epub Ahead of Print, In-Process & Other Non-Indexed Citations, Ovid MEDLINE(R) Daily, Ovid MEDLINE and Versions(R) [Searched 19 <sup>th</sup> April 2017; updated 30 <sup>th</sup> January 2018] |                                                                            |                  |
|-------------------------------------------------------------------------------------------------------------------------------------------------------------------------------------------------------------------------------------|----------------------------------------------------------------------------|------------------|
| #                                                                                                                                                                                                                                   | Search terms                                                               | Results returned |
| 1                                                                                                                                                                                                                                   | Sarcoma, Synovial/                                                         | 2958             |
| 2                                                                                                                                                                                                                                   | ((synovi* or tendosynovial) adj2 (sarcoma or malignant)).tw.               | 3175             |
| 3                                                                                                                                                                                                                                   | (synoviasarcoma or synoviosarcoma or synovioma).tw.                        | 211              |
| 4                                                                                                                                                                                                                                   | Liposarcoma/                                                               | 3965             |
| 5                                                                                                                                                                                                                                   | (myxosarcoma or myxoid liposarcoma or round cell liposarcoma or MRCLS).tw. | 966              |
| 6                                                                                                                                                                                                                                   | mixed type liposarcoma.tw.                                                 | 28               |
| 7                                                                                                                                                                                                                                   | or/1-6                                                                     | 8587             |
| 8                                                                                                                                                                                                                                   | Case study/ or case reports/                                               | 1,878,316        |
| 9                                                                                                                                                                                                                                   | (case adj2 (stud * or report *)).tw.                                       | 588,258          |
| 10                                                                                                                                                                                                                                  | 8 or 9                                                                     | 2,141,590        |
| 11                                                                                                                                                                                                                                  | 7 not 10                                                                   | 4602             |
| 12                                                                                                                                                                                                                                  | limit 11 to yr="2000-current" [April 19 2017] *                            | 2353             |
| Database searched: Embase 1974 to 2017 [Searched 19 <sup>th</sup> April 2017; updated 30 <sup>th</sup> January 2018]                                                                                                                |                                                                            |                  |
| #                                                                                                                                                                                                                                   | Search terms                                                               | Results returned |
| 1                                                                                                                                                                                                                                   | exp * synovial sarcoma/                                                    | 2325             |
| 2                                                                                                                                                                                                                                   | ((synovi* or tendosynovial) adj2 (sarcoma or malignant)).tw.               | 3953             |
| 3                                                                                                                                                                                                                                   | (synoviasarcoma or synoviosarcoma or synovioma).tw.                        | 193              |
| 4                                                                                                                                                                                                                                   | exp * Liposarcoma/                                                         | 3934             |
| 5                                                                                                                                                                                                                                   | (myxosarcoma or myxoid liposarcoma or round cell liposarcoma or MRCLS).tw. | 1177             |
| 6                                                                                                                                                                                                                                   | mixed type liposarcoma.tw.                                                 | 36               |
| 7                                                                                                                                                                                                                                   | or/1-6                                                                     | 8957             |
| 8                                                                                                                                                                                                                                   | Case study/ or case report/                                                | 2,307,885        |
| 9                                                                                                                                                                                                                                   | (case adj2 (stud * or report *)).tw.                                       | 750,563          |
| 10                                                                                                                                                                                                                                  | 8 or 9                                                                     | 2,526,844        |
| 11                                                                                                                                                                                                                                  | 7 not 10                                                                   | 4737             |
| 12                                                                                                                                                                                                                                  | limit 11 to yr="2000 -Current" [April 19 2017] *                           | 3116             |
| 13                                                                                                                                                                                                                                  | conference.so.                                                             | 2,542,009        |
| 14                                                                                                                                                                                                                                  | 12 not 13                                                                  | 2225             |
| Database searched: EBM Reviews - Cochrane Central Register of Controlled Trials [Searched 19 <sup>th</sup> April 2017; updated 30 <sup>th</sup> January 2018]                                                                       |                                                                            |                  |
| #                                                                                                                                                                                                                                   | Search terms                                                               | Results returned |
| 1                                                                                                                                                                                                                                   | sarcoma, synovial/                                                         | 0                |
| 2                                                                                                                                                                                                                                   | ((synovi* or tendosynovial) adj2 (sarcoma or malignant)).tw.               | 22               |
| 3                                                                                                                                                                                                                                   | (synoviasarcoma or synoviosarcoma or synovioma).tw.                        | 0                |

|   |                                                                            |    |
|---|----------------------------------------------------------------------------|----|
| 4 | Liposarcoma/                                                               | 6  |
| 5 | (myxosarcoma or myxoid liposarcoma or round cell liposarcoma or MRCLS).tw. | 5  |
| 6 | mixed type liposarcoma.tw.                                                 | 1  |
| 7 | or/1-6 [April 19 2017] *                                                   | 32 |

\* Searches were updated on 30<sup>th</sup> January 2018; the following numbers of additional references were identified from all databases combined (From 1<sup>st</sup> January 2017-30<sup>th</sup> January 2018): 408 abstracts.

**Table S2.** Reported objectives of studies included in review.

| <b>Author,<br/>Publication Year</b>   | <b>Objectives</b>                                                                                                                                                                                                                                                                                                |
|---------------------------------------|------------------------------------------------------------------------------------------------------------------------------------------------------------------------------------------------------------------------------------------------------------------------------------------------------------------|
| <b>Localized</b>                      |                                                                                                                                                                                                                                                                                                                  |
| De Silva, 2004 [1]                    | To study the association of clinicopathologic variables with recurrence, metastases, and tumor-related death in patients with synovial sarcoma who did not have metastases at presentation.                                                                                                                      |
| Scheer, 2016 [2]                      | Assess the outcomes, identify prognostic factors, and to analyse treatment strategies in synovial sarcoma patients with metastases at diagnosis.                                                                                                                                                                 |
| Krieg, 2011 [3]                       | To investigate the extent to which individual clinical tumor-specific factors as well as surgical approach affect the outcome of patients with synovial sarcoma with at least 10-year follow-up.                                                                                                                 |
| Beaino, 2016 [4]                      | To determine the local recurrence-free survival and distant recurrence-free survival in patients with T1 (<5 cm) localized synovial sarcoma; To identify what determines local recurrence and metastasis; To assess if radiation and chemotherapy affect local recurrence and metastasis in early stage disease. |
| Orbach, 2011 [5]                      | To determine if the modified indications for radiotherapy or radical surgery, according to the quality of initial resection and response to initial chemotherapy, had an impact on survival.                                                                                                                     |
| Shi, 2013 [6]                         | To review the outcomes of a cohort of synovial sarcoma patients at single institution, identify prognostic factors impacting both local and distant disease control, and document acute and late toxicity related to treatment.                                                                                  |
| Eilber, 2007 [7]                      | To determine if ifosfamide-based chemotherapy offers a survival benefit to adult patients with primary extremity synovial sarcoma.                                                                                                                                                                               |
| Al-Hussaini, 2011 [8]                 | To investigate the impact of chemotherapy on survival in both paediatric and adult patients with localized synovial sarcoma treated at two specialized sarcoma centres.                                                                                                                                          |
| Trassard, 2001 [9]                    | To identify most significant and therapeutically relevant prognostic factors in adults with localized primary synovial sarcomas and to confirm the usefulness of the French Federation of Cancer Centers (FNCLCC) grading system.                                                                                |
| Ferrari, 2015 [10]                    | To assess survival rates and treatment failure patterns; the role of ifosfamide–doxorubicin chemotherapy in improving response rates in patients with unresectable synovial sarcoma; and to determine the impact of omitting adjuvant chemotherapy in patients with low-risk synovial sarcoma.                   |
| Brecht, 2006 [11]                     | To identify risk and treatment factors which influence survival rates in patients with synovial sarcoma.                                                                                                                                                                                                         |
| Italiano, 2009 [12]                   | To clarify the prognosis factors and the impact of neo-adjuvant/adjuvant chemotherapy for adult patients with localized synovial sarcoma.                                                                                                                                                                        |
| Canter, 2008 [13]                     | To analyse the clinicopathologic predictors of distant recurrence and sarcoma-specific death.                                                                                                                                                                                                                    |
| Vlenterie, 2015 [14]                  | To explore age as a prognostic factor in synovial sarcoma patients.                                                                                                                                                                                                                                              |
| Vining, 2017 [15]                     | To study the effect of adjuvant chemotherapy on OS among a large cohort of patients undergoing curative-intent resection of synovial sarcoma.                                                                                                                                                                    |
| Gronchi, 2017 [16]                    | Show the superiority of the neoadjuvant administration of histotype-tailored regimen to standard chemotherapy.                                                                                                                                                                                                   |
| <b>Locally advanced or metastatic</b> |                                                                                                                                                                                                                                                                                                                  |

|                      |                                                                                                                                                                                                                                                                 |
|----------------------|-----------------------------------------------------------------------------------------------------------------------------------------------------------------------------------------------------------------------------------------------------------------|
| Takenaka, 2008 [17]  | To clarify the prognostic impact of SYTY-SSX fusion type, in association with other clinical factors, in patients with synovial sarcoma in Japan.                                                                                                               |
| Setsu, 2013 [18]     | To investigate the phosphorylation status of Akt (protein kinase B), mTOR, 4E-BP1, and S6 in a large series of synovial sarcoma and evaluated the relation between Akt/mTOR pathway activation and clinical and histopathologic features.                       |
| Deshmukh, 2004 [19]  | To determine whether distal or truncal location of synovial sarcoma is of prognostic significance for survival when corrected for tumor size.                                                                                                                   |
| Guillou, 2004 [20]   | To assess the prognostic value of SYT-SSX fusion type, in comparison with other factors, in patients with synovial sarcoma.                                                                                                                                     |
| Palmerini, 2009 [21] | To retrospectively examine all synovial sarcoma patients treated at our institution to identify tumor-related and treatment-related factors influencing survival.                                                                                               |
| Ferrari, 2004 [22]   | To retrospectively analyse a large series of synovial sarcoma patients of all ages who were treated at a single centre.                                                                                                                                         |
| Vlenterie, 2016 [23] | Compared the demographics and outcome of a large subset of advanced synovial sarcoma patients treated in first-line palliative chemotherapy studies between 1976 and 2012 and compared these results with other advanced STS patients treated in these studies. |
| Brennan, 2016 [24]   | To assess the role of age, socioeconomic status and other prognostic factors on outcome for synovial sarcoma.                                                                                                                                                   |
| Corey, 2014 [25]     | To determine demographic and survivorship of 34 soft tissue sarcomas.                                                                                                                                                                                           |
| Spurrell, 2005 [26]  | To look specifically at a cohort of patients with advanced synovial sarcoma and to identify potential prognostic factors.                                                                                                                                       |

---

#### Metastatic disease

---

|                       |                                                                                                                                                                                                               |
|-----------------------|---------------------------------------------------------------------------------------------------------------------------------------------------------------------------------------------------------------|
| Sanfilippo, 2015 [27] | To review all patients with advanced synovial sarcoma treated with trabectedin at four European sarcoma reference centers and within the Italian Rare Cancer Network.                                         |
| Savina, 2017 [28]     | To utilized a unique set of data to assess the modalities of treatment of patients with metastatic STS in a real-life setting, to evaluate their impact on the outcome according to the histological subtype. |

---

#### References

- De Silva, M.V.C.; McMahon, A.D.; Reid, R. Prognostic Factors Associated with Local Recurrence, Metastases, and Tumor-Related Death in Patients with Synovial Sarcoma. *Am. J. Clin. Oncol.* **2004**, *27*, 113–121.
- Scheer, M.; Dantonello, T.; Hallmen, E.; Blank, B.; Sparber-Sauer, M.; Vokuhl, C.; Leuschner, I.; Munter, M.W.; von Kalle, T.; Bielack, S.S.; et al. Synovial Sarcoma Recurrence in Children and Young Adults. *Ann. Surg. Oncol.* **2016**, *23*, 618–626.
- Krieg, A.H.; Hefti, F.; Speth, B.M.; Jundt, G.; Guillou, L.; Exner, U.G.; von Hochstetter, A.R.; Cserhati, M.D.; Fuchs, B.; Mouhsine, E.; et al. Synovial sarcomas usually metastasize after >5 years: A multicenter retrospective analysis with minimum follow-up of 10 years for survivors. *Ann. Oncol.* **2011**, *22*, 458–467.
- Beaino, M.E.; Araujo, D.M.; Gopalakrishnan, V.; Lazar, A.J.; Lin, P.P. Prognosis of T1 synovial sarcoma depends upon surgery by oncologic surgeons. *J.Surg. Oncol.* **2016**, *114*, 490–494.
- Orbach, D.; McDowell, H.; Rey, A.; Bouvet, N.; Kelsey, A.; Stevens, M.C. Sparing strategy does not compromise prognosis in pediatric localized synovial sarcoma: Experience of the International Society of pediatric oncology, malignant mesenchymal tumors (SIOP-MMT) Working Group. *Pediatr. Blood Cancer* **2011**, *57*, 1130–1136.
- Shi, W.; Indelicato, D.J.; Morris, C.G.; Scarborough, M.T.; Gibbs, C.P.; Zlotecki, R.A. Long-term treatment outcomes for patients with synovial sarcoma: A 40-year experience at the university of Florida. *Am. J. Clin. Oncol.* **2013**, *36*, 83–88.
- Eilber, F.C.; Brennan, M.F.; Eilber, F.R.; Eckardt, J.J.; Grobmyer, S.R.; Riedel, E.; Forscher, C.; Maki, R.G.; Singer, S. Chemotherapy is associated with improved survival in adult patients with primary extremity synovial sarcoma. *Ann. Surg.* **2007**, *246*, 105–113.
- Al-Hussaini, H.; Hogg, D.; Blackstein, M.E.; O'Sullivan, B.; Catton, C.N.; Chung, P.W.; Griffin, A.M.; Hodgson, D.; Hopyan, S.; Kandel, R.; et al. Clinical features, treatment, and outcome in 102 adult and pediatric patients with localized high-grade synovial sarcoma. *Sarcoma* **2011**, *2011*, 231789.

9. Trassard, M.; Le Doussal, V.; Hacene, K.; Terrier, P.; Ranchere, D.; Guillou, L.; Fiche, M.; Collin, F.; Vilain, M.O.; Bertrand, G.; et al. Prognostic factors in localized primary synovial sarcoma: A multicenter study of 128 adult patients. *J. Clin. Oncol.* **2001**, *19*, 525–534.
10. Ferrari, A.; de Salvo, G.L.; Brennan, B.; van Noesel, M.M.; De Paoli, A.; Casanova, M.; Francotte, N.; Kelsey, A.; Alaggio, R.; Oberlin, O.; et al. Synovial sarcoma in children and adolescents: The European Pediatric Soft Tissue Sarcoma Study Group prospective trial (EpSSG NRSTS 2005). *Ann. Oncol.* **2015**, *26*, 567–572.
11. Brecht, I.B.; Ferrari, A.; Int-Veen, C.; Schuck, A.; Mattke, A.C.; Casanova, M.; Bisogno, G.; Carli, M.; Koscielniak, E.; Treuner, J. Grossly-resected synovial sarcoma treated by the German and Italian pediatric soft tissue sarcoma cooperative groups: Discussion on the role of adjuvant therapies. *Pediatr. Blood Cancer* **2006**, *46*, 11–17.
12. Italiano, A.; Penel, N.; Robin, Y.M.; Bui, B.; Le Cesne, A.; Piperno-Neumann, S.; Tubiana-Hulin, M.; Bompas, E.; Chevreau, C.; Isambert, N.; et al. Neo/adjuvant chemotherapy does not improve outcome in resected primary synovial sarcoma: A study of the French Sarcoma Group. *Ann. Oncol.* **2009**, *20*, 425–430.
13. Canter, R.J.; Qin, L.X.; Maki, R.G.; Brennan, M.F.; Ladanyi, M.; Singer, S. A synovial sarcoma-specific preoperative nomogram supports a survival benefit to ifosfamide-based chemotherapy and improves risk stratification for patients. *Clin. Cancer Res.* **2008**, *14*, 8191–8197.
14. Vlenterie, M.; Ho, V.K.Y.; Kaal, S.E.J.; Vlenterie, R.; Haas, R.; Van Der Graaf, W.T.A. Age as an independent prognostic factor for survival of localised synovial sarcoma patients. *Br. J. Cancer* **2015**, *113*, 1602–1606.
15. Vining, C.C.; Sinnamon, A.J.; Ecker, B.L.; Kelz, R.R.; Fraker, D.L.; Roses, R.E.; Karakousis, G.C., Adjuvant chemotherapy in resectable synovial sarcoma. *J. Surg. Oncol.* **2017**, *116*, 550–558.
16. Gronchi, A.; Ferrari, S.; Quagliuolo, V.; Broto, J.M.; Pousa, A.L.; Grignani, G.; Basso, U.; Blay, J.Y.; Tendero, O.; Beveridge, R.D.; et al. Histotype-tailored neoadjuvant chemotherapy versus standard chemotherapy in patients with high-risk soft-tissue sarcomas (ISG-STS 1001): An international, open-label, randomised, controlled, phase 3, multicentre trial. *Lancet Oncol.* **2017**, *18*, 812–822.
17. Takenaka, S.; Ueda, T.; Naka, N.; Araki, N.; Hashimoto, N.; Myoui, A.; Ozaki, T.; Nakayama, T.; Toguchida, J.; Tanaka, K.; et al. Prognostic implication of SYT-SSX fusion type in synovial sarcoma: A multi-institutional retrospective analysis in Japan. *Oncol. Rep.* **2008**, *19*, 467–476.
18. Setsu, N.; Kohashi, K.; Fushimi, F.; Endo, M.; Yamamoto, H.; Takahashi, Y.; Yamada, Y.; Ishii, T.; Yokoyama, K.; Iwamoto, Y.; et al. Prognostic impact of the activation status of the Akt/mTOR pathway in synovial sarcoma. *Cancer* **2013**, *119*, 3504–3513.
19. Deshmukh, R.; Mankin, H.J.; Singer, S. Synovial Sarcoma: The Importance of Size and Location for Survival. *Clin. Orthop. Relat. Res.* **2004**, *419*, 155–161.
20. Guillou, L.; Benhattar, J.; Bonichon, F.; Gallagher, G.; Terrier, P.; Stauffer, E.; De Saint Aubain Somerhausen, N.; Michels, J.J.; Jundt, G.; Vince, D.R.; et al. Histologic grade, but not SYT-SSX fusion type, is an important prognostic factor in patients with synovial sarcoma: A multicenter, retrospective analysis. *J. Clin. Oncol.* **2004**, *22*, 4040–4050.
21. Palmerini, E.; Staals, E.L.; Alberghini, M.; Zanella, L.; Ferrari, C.; Benassi, M.S.; Picci, P.; Mercuri, M.; Bacci, G.; Ferrari, S. Synovial sarcoma: Retrospective analysis of 250 patients treated at a single institution. *Cancer* **2009**, *115*, 2988–2998.
22. Ferrari, A.; Gronchi, A.; Casanova, M.; Meazza, C.; Gandola, L.; Collini, P.; Lozza, L.; Bertulli, R.; Olmi, P.; Casali, P.G. Synovial sarcoma: A retrospective analysis of 271 patients of all ages treated at a single institution. *Cancer* **2004**, *101*, 627–634.
23. Vlenterie, M.; Litiere, S.; Rizzo, E.; Marreaud, S.; Judson, I.; Gelderblom, H.; Le Cesne, A.; Wardelmann, E.; Messiou, C.; Gronchi, A.; et al. Outcome of chemotherapy in advanced synovial sarcoma patients: Review of 15 clinical trials from the European Organisation for Research and Treatment of Cancer Soft Tissue and Bone Sarcoma Group; Setting a new landmark for studies in this entity. *Eur. J. Cancer* **2016**, *58*, 62–72.
24. Brennan, B.; Stiller, C.; Grimer, R.; Dennis, N.; Broggio, J.; Francis, M. Outcome and the effect of age and socioeconomic status in 1318 patients with synovial sarcoma in the English National Cancer Registry: 1985–2009. *Clin. Sarcoma Res.* **2016**, *6*, 18.
25. Corey, R.M.; Swett, K.; Ward, W.G. Epidemiology and survivorship of soft tissue sarcomas in adults: A national cancer database report. *Cancer Med.* **2014**, *3*, 1404–1415.
26. Spurrell, E.L.; Fisher, C.; Thomas, J.M.; Judson, I.R. Prognostic factors in advanced synovial sarcoma: An analysis of 104 patients treated at the Royal Marsden Hospital. *Ann. Oncol.* **2005**, *16*, 437–444.
27. Sanfilippo, R.; Dileo, P.; Blay, J.Y.; Constantinidou, A.; Le Cesne, A.; Benson, C.; Vizzini, L.; Contu, M.; Baldi, G.G.; Dei Tos, A.P.; et al. Trabectedin in advanced synovial sarcomas: A multicenter retrospective

study from four European institutions and the Italian Rare Cancer Network. *Anticancer Drugs* **2015**, *26*, 678–681.

28. Savina, M.; Le Cesne, A.; Blay, J.Y.; Ray-Coquard, I.; Mir, O.; Toulmonde, M.; Cousin, S.; Terrier, P.; Ranchere-Vince, D.; Meeus, P.; et al. Patterns of care and outcomes of patients with METAstatic soft tissue SARComa in a real-life setting: The METASARC observational study. *BMC Med.* **2017**, *15*, 78.

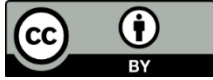

© 2018 by the authors. Licensee MDPI, Basel, Switzerland. This article is an open access article distributed under the terms and conditions of the Creative Commons Attribution (CC BY) license (<http://creativecommons.org/licenses/by/4.0/>).
